# Supplementary material
Source: publisher figshare collection journal article supplement (https://acs.figshare.com/ndownloader/files/28728974)
Supplement: Supplementary file 1 [file 28728974]

# Supporting Information for

## Manipulating Frontal Polymerization and Instabilities with Phase- Changing Microparticles

Yuan Gao<sup>1,2</sup>, Mason Dearborn<sup>3</sup>, Sagar Vyas<sup>1,2</sup>, Aditya Kumar<sup>1,2</sup>, Julie Hemmer<sup>1</sup>, Zhao Wang<sup>3</sup>,  
Qiong Wu<sup>1,4</sup>, Omar Alshangti<sup>1,4</sup>, Jeffrey S. Moore<sup>1,4</sup>, Aaron P. Esser-Kahn<sup>3,\*</sup>, Philippe H.  
Geubelle<sup>1,2,\*</sup>

<sup>1</sup>Beckman Institute for Advanced Science and Technology, University of Illinois, Urbana, IL 61801, United States

<sup>2</sup>Department of Aerospace Engineering, University of Illinois, Urbana, IL 61801, United States

<sup>3</sup>Pritzker School of Molecular Engineering, University of Chicago, Chicago, IL,60637, United States

<sup>4</sup>Department of Chemistry, University of Illinois, Urbana, IL 61801, United States

\*Correspondence to:

Aaron P. Esser-Kahn (E-mail: [aesserkahn@uchicago.edu](mailto:aesserkahn@uchicago.edu), experimental part)

Philippe H. Geubelle (E-mail: [geubelle@illinois.edu](mailto:geubelle@illinois.edu), computational part)

This document includes:

Figures S1-S2

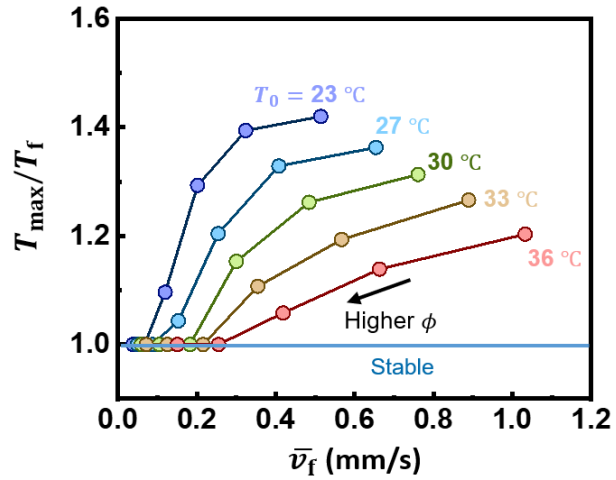

Figure S1. Temperature ratio  $T_{\max}/T_f$  as functions of average front velocity  $\bar{v}_f$  at various initial temperatures  $T_0$ . At a specific initial temperature  $T_0$ , a higher volume fraction of the PCL microparticles can reduce the instability (a temperature ratio close to 1) but compromises on  $\bar{v}_f$ . However, such compromise will be more acceptable at a higher  $T_0$ , where a higher  $\bar{v}_f$  can be achieved at a given  $T_{\max}/T_f$  (to the bottom-right of the graph).

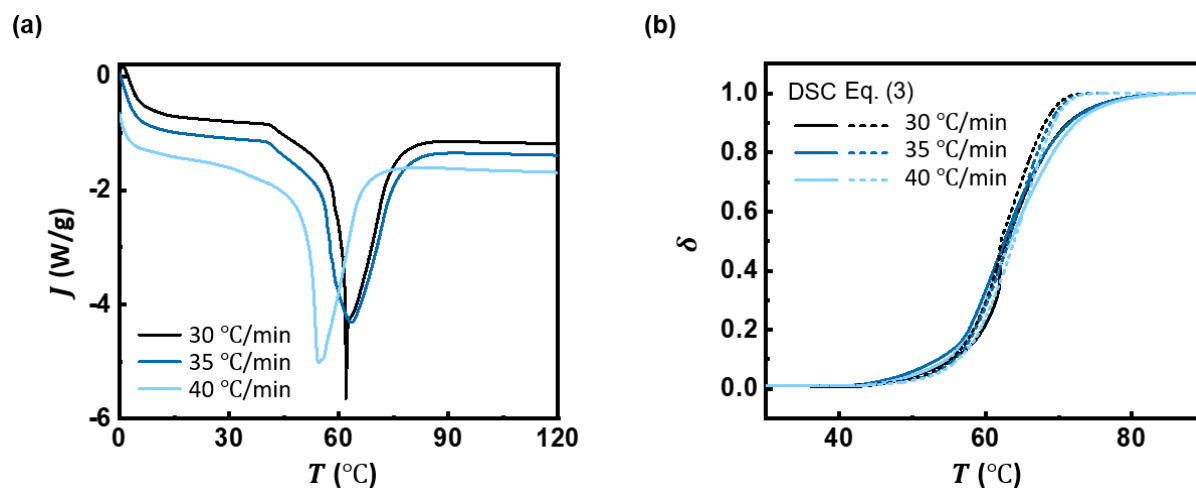

Figure S2. (a) DSC measurements of PCL microparticles at various ramping rates. The endothermic peaks indicate a melting enthalpy  $H_p$  of  $89.0 \pm 2.0$  J/g. (b) Evolutions of the degree of melting in PCL microparticles measured in experiments and predicted by the melting kinetics model in (3) in the main text.
